# Supplementary material for: Phenotypic and Genotypic Comparison of a Live-Attenuated Genotype I Japanese Encephalitis Virus SD12-F120 Strain with Its Virulent Parental SD12 Strain
Source: MDPI journal article supplement (doi:10.3390/v12050552), 2020-05-16
Supplement: s1 [file s1]

**Supplementary Table 1 Attenuation history of JEV isogenic pairs**

| Isogenic strain pair               | Attenuation history                                                                                                                                                       | Designated name | GenBank No. | Reference             |
|------------------------------------|---------------------------------------------------------------------------------------------------------------------------------------------------------------------------|-----------------|-------------|-----------------------|
| SD12-F120 vs SD12 pair             | Parental SD12 isolated from brain of an aborted swine fetus                                                                                                               | SD12            | MH753127    | N/A                   |
|                                    | 100 serial passages of SD12 in BHK-21 cells, followed by three plaque purifications from small plaque variant on BHK-21 cells and virulence tests in three-week-old mice. | SD12-F100       | N/A         |                       |
|                                    | 120 serial passages in BHK-21 cells, followed by three plaque purifications on BHK-21 cells and virulence tests in three-week-old mice.                                   | SD12-F120       | MN544779    |                       |
| SCYA201201-0901 vs SCYA201201 pair | Parental JEV SCYA201201-1 virus isolated from the brain tissues of aborted piglet.                                                                                        | SCYA201201-1    | KU508408    | Zhou Y, et al., 2018  |
|                                    | 16 passages of SCYA201201-1 in BHK-21 cells.                                                                                                                              | SCYA201201      | N/A         |                       |
|                                    | 86 passages in BHK-21 cells and 3 plaque purifications of small plaque variant of SCYA2012-1.                                                                             | SCYA201201-86   | N/A         |                       |
|                                    | 120 passages in BHK-21 cells and 3 plaque purifications with virulence selections of 3-week-old mice inoculated intracranially.                                           | SCYA201201-0901 | MF124315    |                       |
| 10S3 vs HEN0701 pair               | Virulent HEN0701 is originally isolated from aborted pig fetus.                                                                                                           | HEN0701         | FJ495189    | Zheng X, et al., 2018 |

|                        |                                                                                                           |             |          |                      |
|------------------------|-----------------------------------------------------------------------------------------------------------|-------------|----------|----------------------|
|                        | Derived from HEN0701 by 100 passages in BHK-21 cells.                                                     | 10S3        | MF542268 |                      |
| SA14-14-2 vs SA14 pair | Parental JE SA14 virus isolated from a pool of <i>Culex pipiens</i> larvae by 11 passages in mouse brain. | SA14        | KU323483 | Yun SI, et al., 2016 |
|                        | 100 serial passages in PHK cells, followed by three plaque Purifications.                                 | SA14-12-1-7 | N/A      |                      |
|                        | Five suckling mice skin passages (s.c. inoculation) followed by two plaque purifications.                 | SA14-14-2   | JN604986 |                      |
| RP-2ms vs RP-9 pair    | Virulent RP-9 is generated from a Taiwanese isolate NT109 using $\gamma$ -ray irradiation.                | RP-9        | AF014161 | Lin YL, et al., 1996 |
|                        | Attenuated RP-2ms is also generated from a Taiwanese isolate NT109 using $\gamma$ -ray irradiation.       | RP-2ms      | AF014160 |                      |

**Supplementary Table 2** Primers sequences used in this study

|                      | Primer    | Genomic Position | Sequence 5'-3'                            |
|----------------------|-----------|------------------|-------------------------------------------|
| qRT-PCR              | JEV probe | 215-240          | CGTGCAGTATGGTCGCTGCACACGGA <sup>FAM</sup> |
|                      | JEV-F     | 119-138          | CATGTGTGARGACACYATCA                      |
|                      | JEV-R     | 308-327          | CCAGCCAAGCCTCTTTTTTR                      |
| Genome<br>sequencing | JEV-1f    | 1-26             | AGAAGTTTATCTGTGTGAACTTCTTG                |
|                      | JEV-1r    | 2892-2913        | ATCAGGGCATTCCCTTGTCTCG                    |
|                      | JEV-2f    | 2371-2391        | GGGGCCTTACTTCTTTGGATG                     |
|                      | JEV-2r    | 5655-5675        | GCATAGTCCGTGATCCATTCG                     |
|                      | JEV-3f    | 5455-5477        | GTGATGGATGAGGCTCACTTCAC                   |
|                      | JEV-3r    | 9184-9204        | CACCCACCTCCTGAATTCTC                      |
|                      | JEV-4f    | 8791-8813        | GTCAAGGAAGTGCTCAACGAGAC                   |
|                      | JEV-4r    | 10931-10954      | TCTTCCTCACCACCAGCTACATAC                  |
